# Supplementary material
Source: PubMed Central journal article supplement (PMC6038696)

---

Supplemental Table 1: Serum cytokine levels (pg/ml) in postpubertal baboon offspring.

| Treatment | IL-1 $\beta$ | IL-5        | IL-6           | IL-16         | IL-12-P70     | GM-CSF    | IFN $\gamma$ | TNF $\alpha$ |
|-----------|--------------|-------------|----------------|---------------|---------------|-----------|--------------|--------------|
| Untreated | 12 $\pm$ 5   | 37 $\pm$ 16 | 1232 $\pm$ 190 | 976 $\pm$ 321 | 716 $\pm$ 172 | 2 $\pm$ 1 | 9 $\pm$ 4    | 41 $\pm$ 34  |
| Letrozole | 9 $\pm$ 4    | 38 $\pm$ 10 | 1054 $\pm$ 233 | 988 $\pm$ 366 | 579 $\pm$ 197 | 3 $\pm$ 1 | 14 $\pm$ 4   | 50 $\pm$ 28  |

---

Values expressed as mean  $\pm$  SE in 6-8 year old postpubertal offspring of baboons untreated (n=5) or treated *in utero* with letrozole (n =5).

# Supplemental Figure 1

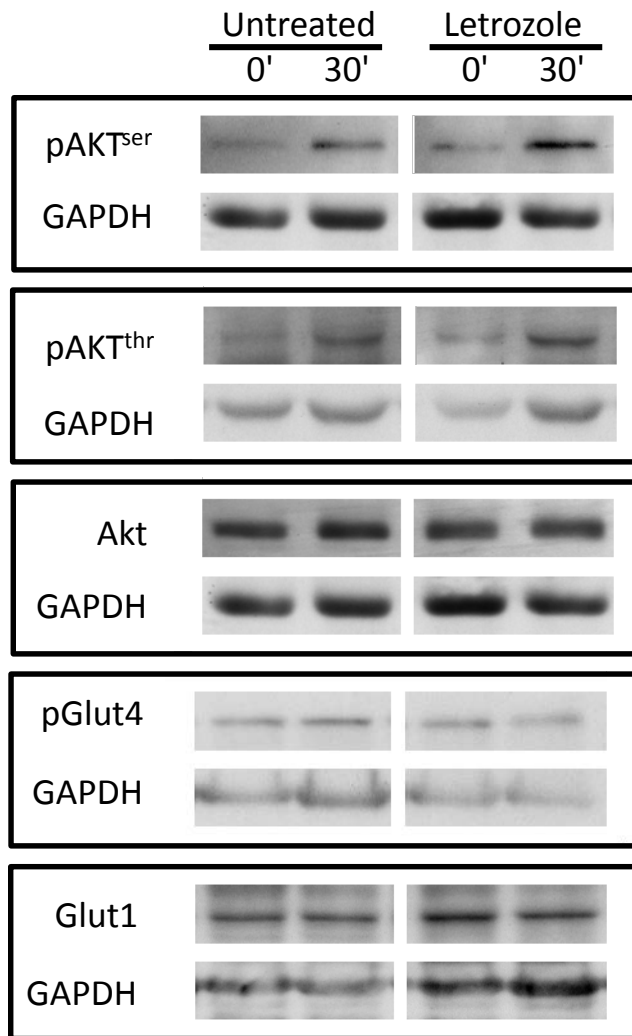

Supplement: NIHMS977344-supplement-1.pdf [file NIHMS977344-supplement-1.pdf]
